# Supplementary material for: Organization of supramolecular assembly of 9-mesityl-10-carboxymethylacridinium ion and fullerene clusters on TiO2 nanoparticles for light energy conversion
Source: Royal Society of Chemistry journal article supplement (doi:10.1039/b413336f), 2004-11-22
Supplement: b413336f.pdf [file b413336f.pdf]

## Electronic Supplementary Information

### Organization of supramolecular assembly of 9-mesityl-10-carboxymethylacridinium ion and fullerene clusters on TiO<sub>2</sub> nanoparticles for light energy conversion

Taku Hasobe,<sup>a,b</sup> Shigeki Hattori,<sup>a,b</sup> Prashant V. Kamat,<sup>\*c</sup> Yuji Wada,<sup>a</sup> and Shunichi Fukuzumi<sup>\*a,b</sup>

Department of Material and Life Science, Graduate School of Engineering, Osaka University, Suita, Osaka 565-0871, Japan

CREST, Japan Science and Technology Agency, Suita, Osaka 565-0871, Japan

Radiation Laboratory and Department of Chemical & Biomolecular Engineering, University of Notre Dame, Notre Dame, Indiana 46556, USA

---

<sup>a</sup> Osaka University, <sup>b</sup>CREST, <sup>c</sup> University of Notre Dame

## Synthesis

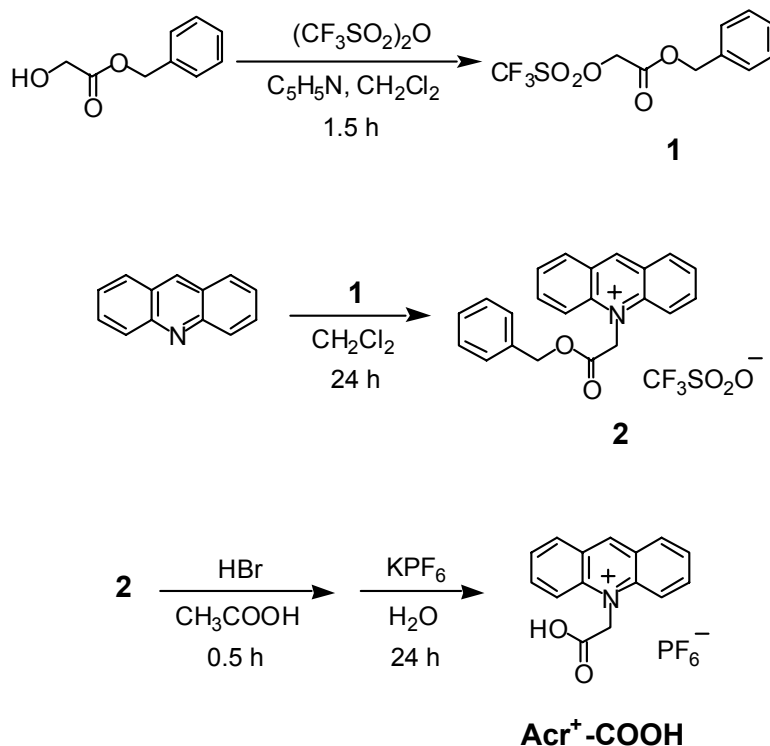

**Scheme S1.** Synthesis of  $\text{Acr}^+\text{-COOH}$

**Triflate of benzylglycolate 1:**<sup>1</sup> **1** was prepared using a slight modification of the reported literature methods. To a solution of benzyl glycolate (1.66 g, 10.0 mmol) and pyridine (0.89 mL, 11.0 mmol) in  $\text{CH}_2\text{Cl}_2$  (40 mL) at  $-20\text{ }^\circ\text{C}$  was added triflic anhydride (1.84 mL, 11.0 mmol) over a period of 5-10 min. After complete addition, the reaction mixture was stirred for 30 min and warmed to rt, and stirred for additional 30 min. The reaction mixture was evaporated and rapidly passed through a short column of silica gel eluting with  $\text{CH}_2\text{Cl}_2$ . The fractions containing triflate were combined, the solvent was evaporated, and the residue was subjected to a second rapid chromatography (1/1,  $\text{CH}_2\text{Cl}_2$ /hexane) to provide 2.24 g of the triflate as a pale yellow oil which solidified at  $0\text{ }^\circ\text{C}$ . This material was suitable for use directly without any further purification:  $^1\text{H}$  NMR  $\delta$  4.93 (s, 2H), 5.28 (s, 2H), 7.38 (s, 5H).

**10-Benzyloxycarbonylmethylacridinium triflate 2:**<sup>2</sup> To a solution of acridine (0.060 g, 0.336 mmol) and in  $\text{CH}_2\text{Cl}_2$  (0.764 mL) at  $-15\text{ }^\circ\text{C}$  was added triflate of benzylglycolate (0.11 g, 0.370 mmol) over a period of 5-10 min. After complete addition, the reaction mixture was stirred for 30 min and warmed to rt, and stirred for additional 24 h. Dried

diethylether was added to the reaction mixture and precipitated crystals were filtered, yielding an acridinium ester protected by a benzyl group. (0.13 g, 0.272 mmol, 83%):  $^1\text{H}$  NMR ( $\text{CD}_3\text{CN}$ ):  $\delta$  5.28 (s, 2H,  $\text{CH}_2$ ), 6.15 (s, 2H,  $\text{CH}_2$ ), 7.38 (s, 5H, Ar-H), 8.01 (t with  $J = 8$  Hz, 2H, Ar-H), 8.35-8.44 (m, 4H, Ar-H), 8.58 (d with  $J = 8$  Hz, 2H, Ar-H), 9.99 (s, 1H, Ar-H). MALDI-TOF-MS  $m/z$  328.0 (Calcd for  $\text{C}_{22}\text{H}_{18}\text{NO}_2^+$   $m/z$  328.1).

**10-Carboxylmethylxacridinium hexafluorophosphate  $\text{Acr}^+-\text{COOH}$ :**<sup>3</sup> The acridinium ester protected by a benzyl group **2** (0.13 g, 0.279 mmol) was suspended in a 30% solution of hydrogen bromide/acetic acid (3.00 mL), and heated for 30 minutes at 50 °C, and the solvent was removed in vacuo. The resulting solid was dissolved in distilled water and was added to a solution of potassium hexafluorophosphate (2.96 g, 16.1 mmol) in 34.0 mL of distilled water. The resulting solution was stirred for 24h at room temperature, and precipitated crystals were filtered, yielding an acridinium carboxyl derivative ( **$\text{Acr}^+-\text{COOH}$** ) (0.059 g, 0.153 mmol, 55%): UV-VIS ( $\text{CH}_3\text{CN}$ )  $\lambda_{\text{max}}$  ( $\epsilon$ ) 344 (14560), 359 (26830), 419 ( $6340 \text{ mol}^{-1} \text{ dm}^3 \text{ cm}^{-1}$ ) nm.  $^1\text{H}$  NMR ( $\text{CD}_3\text{CN}$ ):  $\delta$  5.95 (s, 2H,  $\text{CH}_2$ ), 7.95 (t with  $J = 7$  Hz, 2H, Ar-H), 8.33 (t with  $J = 7$  Hz, 2H, Ar-H), 8.43 (d with  $J = 7$  Hz, 2H, Ar-H), 8.51 (d with  $J = 7$  Hz, 2H, Ar-H), 9.88 (s, 1H, Ar-H). MALDI-TOF-MS  $m/z$  238.0 (Calcd for  $\text{C}_{15}\text{H}_{12}\text{NO}_2^+$   $m/z$  238.1).

**Preparation of  $\text{TiO}_2$  nanocrystallites films modified with  $\text{Mes-Acr}^+-\text{COOH}$  (denoted as  $\text{OTE/TiO}_2/\text{Mes-Acr}^+-\text{COOH}$ ).** Nanoporous  $\text{TiO}_2$  electrodes were prepared by dropping the colloidal suspensions of  $\text{TiO}_2$  nanoparticles (P25,  $d = 21$  nm, Nippon Aerogel) on optically transparent electrode (OTE) (Nippon Sheet Glass,  $\text{SnO}_2:\text{F}$ ,  $8 \Omega/\text{square}$ ) with a glass rod and adhesive tapes as a spacer. The resulting electrodes ( $\text{OTE/TiO}_2$ ) were annealed at 450 °C in air for 30 min. The thickness of the electrodes ranged between 13 and 14  $\mu\text{m}$  as measured by a profiler. Coloration of the  $\text{TiO}_2$  surface with the  **$\text{Mes-Acr}^+-\text{COOH}$**  was carried out by immersing the film (still warm, i.e., 80 ~ 100 °C) for 12 h in acetonitrile containing  $3.0 \times 10^{-4} \text{ mol dm}^{-3}$  of  **$\text{Mes-Acr}^+-\text{COOH}$** . After completion of the  **$\text{Mes-Acr}^+-\text{COOH}$**  adsorption, the electrode was withdrawn from the solution, washed with acetonitrile, and dried. The  $\text{TiO}_2$  nanocrystallites films

modified with  $\text{Acr}^+-\text{COOH}$  (denote as  $\text{OTE}/\text{TiO}_2/\text{Acr}^+-\text{COOH}$ ) were similarly prepared.

### References

- (1) Triflate of benzylglycolate was synthesized according to the procedure in: V. R. Escher, and P. Bünning, *Angew. Chem.*, 1986, **98**, 264
- (2) For the synthesis of acridinium ester, see: N. Sato, *Tetrahedron Lett.*, 1996, **37**, 8519.
- (3) Debenzylation was performed according to the procedure in ref. 2.

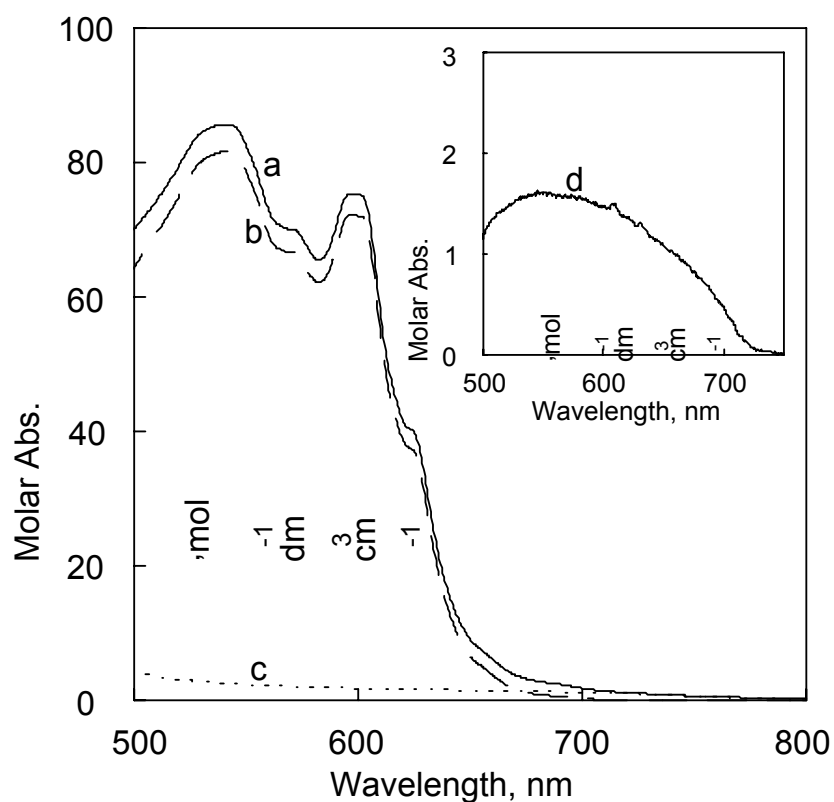

**Fig. S1.** Absorption spectra of (a) the mixture of **Mes-Acr**<sup>+</sup> ( $1.0 \times 10^{-2}$  M) with **C**<sub>60</sub> ( $1.0 \times 10^{-2}$  mol dm<sup>-3</sup>), (b) **C**<sub>60</sub> ( $1.0 \times 10^{-2}$  mol dm<sup>-3</sup>), and (c) **Mes-Acr**<sup>+</sup> ( $1.0 \times 10^{-2}$  mol dm<sup>-3</sup>) in *o*-dichlorobenzene. Absorption spectrum of (d) the CT absorption of **Mes-Acr**<sup>+</sup> with **C**<sub>60</sub> obtained by subtracting the absorptions of **C**<sub>60</sub> ( $1.0 \times 10^{-2}$  mol dm<sup>-3</sup>) (b) and **Mes-Acr**<sup>+</sup> ( $1.0 \times 10^{-2}$  mol dm<sup>-3</sup>) (c) from the absorption of mixture of **Mes-Acr**<sup>+</sup> ( $1.0 \times 10^{-2}$  mol dm<sup>-3</sup>) with **C**<sub>60</sub> ( $1.0 \times 10^{-2}$  mol dm<sup>-3</sup>) (a) in *o*-dichlorobenzene.

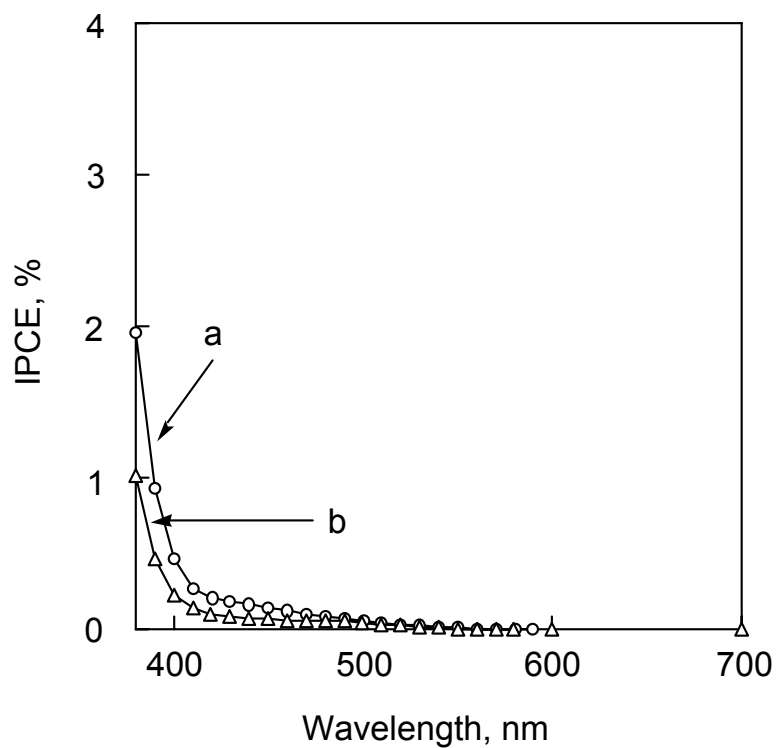

**Fig. S2.** Photocurrent action spectra (IPCE vs. wavelength) of (a) OTE/TiO<sub>2</sub>/Mes-Acr<sup>+</sup>-COOH electrode and (b) OTE/TiO<sub>2</sub>/Acr<sup>+</sup>-COOH electrode.
